# Supplementary material for: Genetic Heterogeneity in Depressive Symptoms Following the Death of a Spouse: Polygenic Score Analysis of the U.S. Health and Retirement Study
Source: Atypon-hosted journal article supplement (doi:10.1176/appi.ajp.2017.16111209), 2017-03-24

**SUPPLEMENTAL MATERIALS TO Genetic heterogeneity in depressive symptoms following the death of a spouse: Polygenic score analysis of the US Health and Retirement Study**

*Genotyping*

HRS SNP genotyping was conducted by the NIH Center for Inherited Disease Research using DNA extracted from saliva collected during face-to-face interviews in HRS respondents' homes in 2006 and 2008 and Illumina HumanOmni 2.5 Quad BeadChip arrays

(<http://hrsonline.isr.umich.edu/index.php?p=xxgen1>).

*Nonlinear Regression Analysis Including All Observations Taken Following Spousal Death.*

We conducted our primary nonlinear regression analysis using data only from only the first observation taken following spousal death, i.e. one observation per HRS respondent. We focused on this first observation because local regression analysis indicated that most spousal-death-related increase in depressive symptoms had dissipated by 24 months following spousal death. HRS assessments are conducted every two years. Thus, about half of all second observations following spousal death and all subsequent observations are expected to fall outside the normal recovery window. To focus nonlinear regression analysis on the initial increase in depressive symptoms following spousal death and recovery from that increase, we restricted our main analysis to only the first observation taken following spousal death.

As a sensitivity analysis, we repeated nonlinear regression analysis including all observations following spousal death. This model yielded slightly different results. The main difference between the models was that the model including all post-death observations estimated a longer total recovery time as compared to the model based on only the first post death observation ( $\lambda=14.04$  as compared to  $\lambda=5.59$  in the original model). The model including all post-death observations also found more modest genetic buffering of depression immediately following spousal death ( $b=-0.37$ , CI -0.63, -0.12,  $p=0.004$  as compared  $b=-0.60$ , CI -0.19, -1.02,  $p=0.004$  in the original model), but larger genetic influence on the rate of recovery ( $\gamma=3.95$ ,  $p<0.001$  as compared to  $\gamma=0.34$ ,  $p=0.739$  in the original model). Substantively, the original model, based on the first post-death observation, suggested that genetics of subjective wellbeing influenced the magnitude of the initial depressogenic shock caused by spousal death and that recovery occurred over a relatively short time interval (about 12 months) at about the same rate regardless of genotype. In contrast, the model including all post-death observations suggested genetics of subjective wellbeing influenced both the magnitude of the initial depressogenic shock and the rate of recovery, with recovery occurring over a somewhat longer time interval (about 24 months).

**Supplemental Figure 1. Time from spousal death to the first follow-up assessment in N=1,647 non-Hispanic white Health and Retirement Study members.** Average time between death and first follow-up assessment was 12 months. Nearly all observations occurred during the first two years following the death.

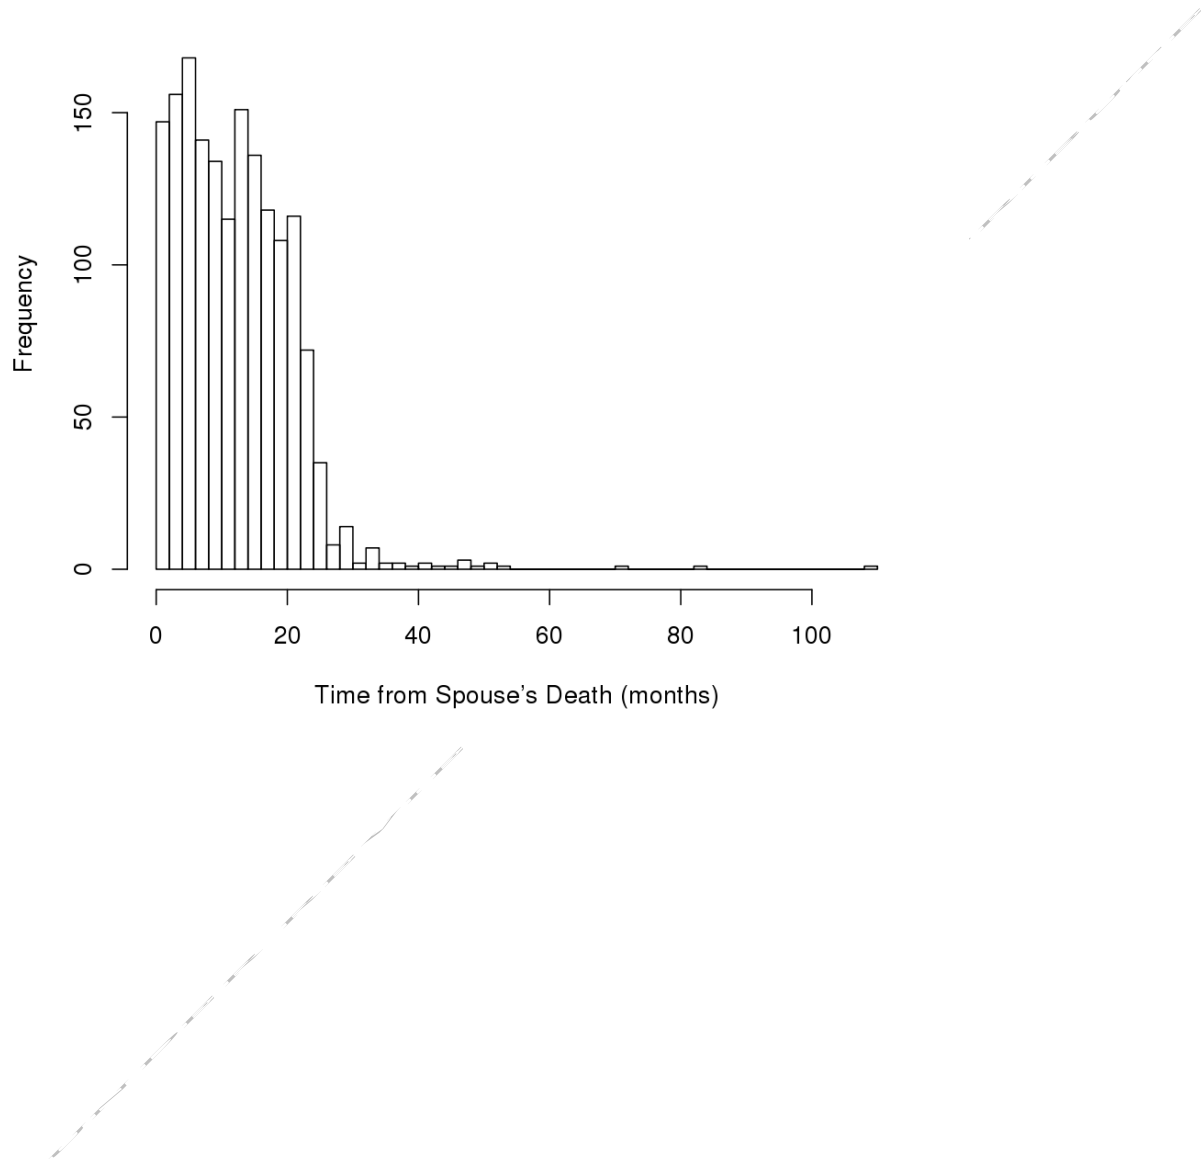

**Supplemental Figure 2. Prototype showing how coefficient estimates from the nonlinear regression contribute to estimation of depressive symptom trajectories following the death of a spouse.** The regression equation is

$$CESD_i = \alpha + \beta_1 PGS_i + (\beta_2 + \beta_3 PGS_i) \exp[-t_i / (\lambda + \gamma PGS_i)] + \chi + \varepsilon_i$$

The figure shows trajectories of depressive symptoms with curved lines. The solid black curved line is the population average trajectory. The line begins on the left side of the graph immediately following increase in depressive symptoms following the spouse's death (estimated by the coefficient  $\beta_2$ ). The slope of the line curves downward from left to right according to the rate of decline in depressive symptoms with time since the death (estimated by the coefficient  $\lambda$ ). The dotted black line shows the estimate of baseline depressive symptoms which the symptom level approaches with increasing time since the death (estimated as the coefficient  $\alpha$ ). The other model parameters test how this population average trajectory varies according to an individual's polygenic score. A trajectory for a person with a polygenic score below the population mean is shown in light gray for illustration. Variation in the magnitude of increase in depressive symptoms immediately following the death is estimated by the coefficient  $\beta_3$ . Variation in the rate of decline in depressive symptoms with time since the death is estimated by the coefficient  $\gamma$ . Variation in the baseline level toward which depressive symptoms decline with time since the death is estimated by  $\beta_1$ .

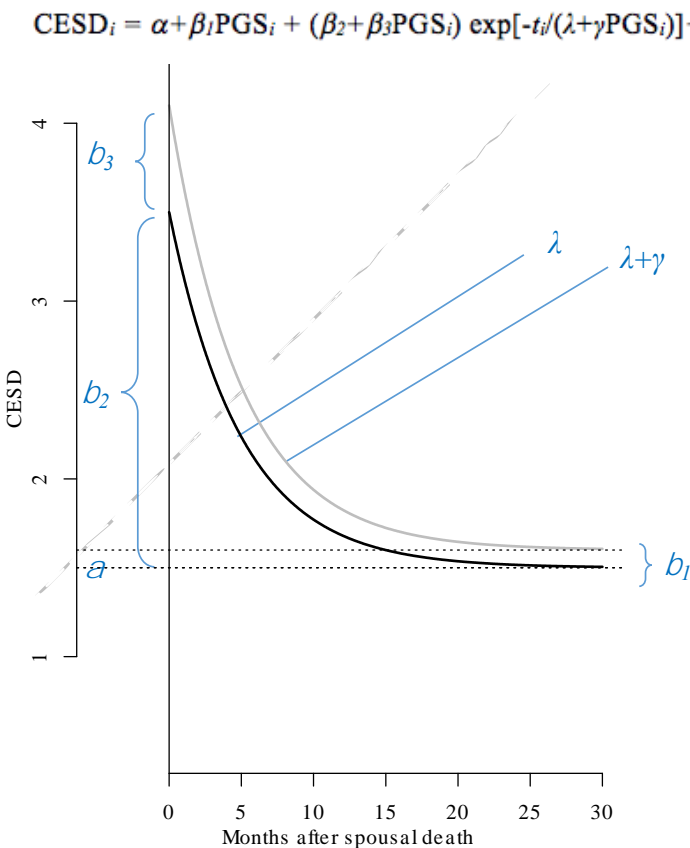

**Supplemental Figure 3. Trajectories of depressive symptoms following spousal death estimated from nonlinear regression models.** The graph shows trajectories of depressive symptoms in the months following spousal death for individuals with low subjective wellbeing polygenic scores (1 SD below the mean, red lines) and high subjective wellbeing polygenic scores (1 SD above the mean, blue lines). Panel A (left side) shows trajectories estimated from models fitted to data from the first observation following spousal death. Panel B (right side) shows trajectories estimated from models fitted to data from all observations following spousal death. Model parameters are shown in the table below the figure. Trajectories are drawn assuming mean age and birth year and female sex.

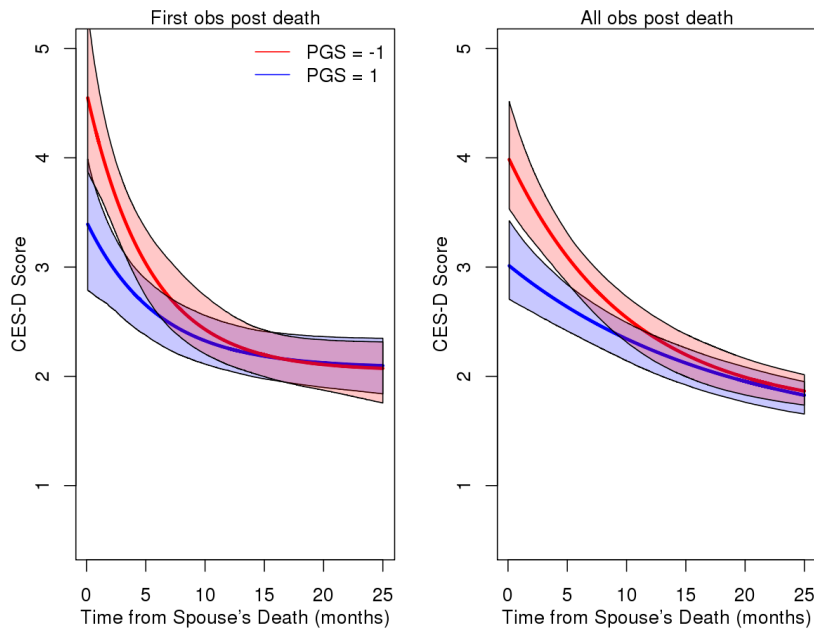

| Nonlinear Regression Model Parameters |                                 |      |          |                                |      |          |
|---------------------------------------|---------------------------------|------|----------|--------------------------------|------|----------|
|                                       | A. First post-death observation |      |          | B. All post-death observations |      |          |
|                                       | Est                             | SE   | p-value  | Est                            | SE   | p-value  |
| <i>a</i>                              | 0.97                            | 0.77 | 0.204    | 0.70                           | 0.61 | 0.246    |
| <u>Covariates</u>                     |                                 |      |          |                                |      |          |
| Male Sex                              | -0.14                           | 0.12 | 0.243    | -0.06                          | 0.10 | 0.550    |
| Birth Year                            | 0.04                            | 0.01 | 0.002    | 0.02                           | 0.01 | 0.044    |
| Age                                   | 0.01                            | 0.01 | 0.175    | 0.01                           | 0.01 | 0.156    |
| <u>Effects</u>                        |                                 |      |          |                                |      |          |
| <i>b</i> <sub>1</sub>                 | 0.01                            | 0.09 | 0.887    | -0.12                          | 0.05 | 0.018    |
| <i>b</i> <sub>2</sub>                 | 1.94                            | 0.22 | 2.90E-18 | 1.96                           | 0.14 | 7.56E-43 |
| <i>b</i> <sub>3</sub>                 | -0.60                           | 0.21 | 0.004    | -0.37                          | 0.13 | 0.004    |
| $\lambda$                             | 5.59                            | 1.52 | 2.53E-04 | 14.04                          | 1.96 | 8.73E-13 |
| $\gamma$                              | 0.34                            | 1.03 | 0.739    | 3.95                           | 1.01 | 9.22E-05 |
| N observations                        | 1,647                           |      |          | 6,092                          |      |          |
| N individuals                         | 1,647                           |      |          | 1,647                          |      |          |
| Total Error Variance                  | 4.54                            |      |          | 3.88                           |      |          |

**Supplemental Table 1. Regression Model Results for Subjective Wellbeing Polygenic Score.** Coefficients are named corresponding to the equation in Supplemental Figure 1. Briefly,  $\alpha$  is the model intercept.  $\beta_1$  is the main effect of the polygenic score.  $\beta_2$  is the main effect of spousal death.  $\beta_3$  is the genetic buffering effect.  $\lambda$  is the rate of attenuation in depressive symptoms with time since the death (the “decay” rate).  $\gamma$  is the estimate of genetic heterogeneity in the decay rate.

|                             | M1. Main Effect of Polygenic Score on Depressive Symptoms* |             |                 | M2. Main Effect of Spousal Death on Depressive Symptoms** |             |                 | M3. Buffering Effect of Polygenic Score on Depressive Symptoms |             |              |
|-----------------------------|------------------------------------------------------------|-------------|-----------------|-----------------------------------------------------------|-------------|-----------------|----------------------------------------------------------------|-------------|--------------|
|                             | Est                                                        | SE          | p-value         | Est                                                       | SE          | p-value         | Est                                                            | SE          | p-value      |
| <i>a</i>                    | 0.26                                                       | 0.07        | 6.35E-05        | 1.00                                                      | 0.77        | 0.191           | 0.97                                                           | 0.77        | 0.204        |
| <u>Covariates</u>           |                                                            |             |                 |                                                           |             |                 |                                                                |             |              |
| Male Sex                    | -0.36                                                      | 0.03        | 9.04E-37        | -0.14                                                     | 0.12        | 0.271           | -0.14                                                          | 0.12        | 0.243        |
| Birth Year                  | 0.02                                                       | 0.00        | 1.87E-27        | 0.04                                                      | 0.01        | 0.002           | 0.04                                                           | 0.01        | 0.002        |
| Age                         | 0.02                                                       | 0.00        | 1.87E-63        | 0.01                                                      | 0.01        | 0.190           | 0.01                                                           | 0.01        | 0.175        |
| <u>Effects</u>              |                                                            |             |                 |                                                           |             |                 |                                                                |             |              |
| <i>b</i> <sub>1</sub>       | <b>-0.10</b>                                               | <b>0.01</b> | <b>4.90E-13</b> |                                                           |             |                 | 0.01                                                           | 0.09        | 0.887        |
| <i>b</i> <sub>2</sub>       |                                                            |             |                 | <b>1.97</b>                                               | <b>0.22</b> | <b>3.41E-18</b> | 1.94                                                           | 0.22        | 2.90E-18     |
| <i>b</i> <sub>3</sub>       |                                                            |             |                 |                                                           |             |                 | <b>-0.60</b>                                                   | <b>0.21</b> | <b>0.004</b> |
| $\lambda$                   |                                                            |             |                 | 5.45                                                      | 1.42        | 1.34E-04        | 5.59                                                           | 1.52        | 2.53E-04     |
| $\gamma$                    |                                                            |             |                 |                                                           |             |                 | 0.34                                                           | 1.03        | 0.739        |
| N observations              | 67,805                                                     |             |                 | 1,647                                                     |             |                 | 1,647                                                          |             |              |
| N individuals               | 8,588                                                      |             |                 | 1,647                                                     |             |                 | 1,647                                                          |             |              |
| Within-individual Variation | 1.42                                                       |             |                 | NA                                                        |             |                 | NA                                                             |             |              |
| Total Error Variance        | 1.61                                                       |             |                 | 4.54                                                      |             |                 | 4.54                                                           |             |              |

\* Model 1 restricts the values of  $\beta_2$  and  $\beta_3$  to be zero, resulting in a standard linear model.

\*\*Model 2 restricts values of  $\beta_1, \beta_3$ , and Delta to zero in order to estimate the main effect of the death of a spouse without regard to genotype.

**Supplemental Table 2. Regression Model Results for Subjective Wellbeing Polygenic Score in All HRS Respondents Who Self-Reported Non-Hispanic White Race/Ethnicity.** Coefficients are named corresponding to the equation in Supplemental Figure 1.

Briefly,  $\alpha$  is the model intercept.  $\beta_1$  is the main effect of the polygenic score.  $\beta_2$  is the main effect of spousal death.  $\beta_3$  is the genetic buffering effect.  $\lambda$  is the rate of attenuation in depressive symptoms with time since the death (the “decay” rate).  $\gamma$  is the estimate of genetic heterogeneity in the decay rate.

|                             | M1. Main Effect of Polygenic Score on Depressive Symptoms* |             |                 | M2. Main Effect of Spousal Death on Depressive Symptoms** |             |                 | M3. Buffering Effect of Polygenic Score on Depressive Symptoms |             |                 |
|-----------------------------|------------------------------------------------------------|-------------|-----------------|-----------------------------------------------------------|-------------|-----------------|----------------------------------------------------------------|-------------|-----------------|
|                             | Est                                                        | SE          | p-value         | Est                                                       | SE          | p-value         | Est                                                            | SE          | p-value         |
| <i>a</i>                    | 0.28                                                       | 0.06        | 1.25E-05        | 1.18                                                      | 0.74        | 0.112           | 1.16                                                           | 0.74        | 0.117           |
| <u>Covariates</u>           |                                                            |             |                 |                                                           |             |                 |                                                                |             |                 |
| Male Sex                    | -0.36                                                      | 0.03        | 8.27E-40        | -0.10                                                     | 0.12        | 0.376           | -0.11                                                          | 0.12        | 0.366           |
| Birth Year                  | 0.02                                                       | 0.00        | 2.19E-27        | 0.03                                                      | 0.01        | 0.003           | 0.03                                                           | 0.01        | 0.003           |
| Age                         | 0.02                                                       | 0.00        | 1.11E-70        | 0.01                                                      | 0.01        | 0.230           | 0.01                                                           | 0.01        | 0.222           |
| <u>Effects</u>              |                                                            |             |                 |                                                           |             |                 |                                                                |             |                 |
| <i>b</i> <sub>1</sub>       | <b>-0.11</b>                                               | <b>0.01</b> | <b>8.96E-16</b> |                                                           |             |                 | -0.02                                                          | 0.09        | 0.838           |
| <i>b</i> <sub>2</sub>       |                                                            |             |                 | <b>1.90</b>                                               | <b>0.22</b> | <b>4.51E-18</b> | 1.86                                                           | 0.21        | 7.09E-18        |
| <i>b</i> <sub>3</sub>       |                                                            |             |                 |                                                           |             |                 | <b>-0.46</b>                                                   | <b>0.20</b> | <b>2.23E-02</b> |
| $\lambda$                   |                                                            |             |                 | 5.47                                                      | 1.42        | 1.26E-04        | 5.63                                                           | 1.55        | 2.89E-04        |
| $\gamma$                    |                                                            |             |                 |                                                           |             |                 | 0.41                                                           | 1.13        | 0.718           |
| N observations              | 74,512                                                     |             |                 | 1,829                                                     |             |                 | 1,829                                                          |             |                 |
| N individuals               | 9,453                                                      |             |                 | 1,829                                                     |             |                 | 1,829                                                          |             |                 |
| Within-individual Variation | 1.49                                                       |             |                 | NA                                                        |             |                 | NA                                                             |             |                 |
| Total Error Variance        | 1.64                                                       |             |                 | 4.62                                                      |             |                 | 4.62                                                           |             |                 |

\* Model 1 restricts the values of  $\beta_2$  and  $\beta_3$  to be zero, resulting in a standard linear model.

\*\*Model 2 restricts values of  $\beta_1, \beta_3$ , and Delta to zero in order to estimate the main effect of the death of a spouse without regard to genotype.

**Supplemental Table 3. Regression Model Results for Major Depressive Disorder and Depressive Symptoms Polygenic Scores.** Polygenic scores were calculated based on GWAS results posted by the Psychiatric Genomics Consortium (<https://www.med.unc.edu/pgc/results-and-downloads>) and the Social Science Genetic Association Consortium (<http://www.thessgac.org/data>). Coefficients are named corresponding to the equation in Supplemental Figure 1.

|                                                                                                   | M1. Main Effect of Polygenic Score on Depressive Symptoms* |             |                 | M2. Main Effect of Spousal Death on Depressive |             |                 | M3. Buffering Effect of Polygenic Score on Depressive Symptoms |             |                 |
|---------------------------------------------------------------------------------------------------|------------------------------------------------------------|-------------|-----------------|------------------------------------------------|-------------|-----------------|----------------------------------------------------------------|-------------|-----------------|
|                                                                                                   | Est                                                        | SE          | pv              | Est                                            | SE          | pv              | Est                                                            | SE          | pv              |
| <b>Panel A: Psychiatric Genomics Consortium Major Depressive Disorder Polygenic Score</b>         |                                                            |             |                 |                                                |             |                 |                                                                |             |                 |
| <i>a</i>                                                                                          | 0.27                                                       | 0.07        | 6.08E-05        | 1.01                                           | 0.77        | 0.191           | 0.99                                                           | 0.77        | 0.196           |
| <u>Covariates</u>                                                                                 |                                                            |             |                 |                                                |             |                 |                                                                |             |                 |
| Male Sex                                                                                          | -0.36                                                      | 0.03        | 3.62E-37        | -0.14                                          | 0.12        | 0.271           | -0.13                                                          | 0.12        | 0.305           |
| Birth Year                                                                                        | 0.02                                                       | 0.00        | 1.70E-27        | 0.04                                           | 0.01        | 0.002           | 0.04                                                           | 0.01        | 0.002           |
| Age                                                                                               | 0.02                                                       | 0.00        | 1.37E-63        | 0.01                                           | 0.01        | 0.190           | 0.02                                                           | 0.01        | 0.181           |
| <u>Effects</u>                                                                                    |                                                            |             |                 |                                                |             |                 |                                                                |             |                 |
| <i>b</i> <sub>1</sub>                                                                             | <b>0.07</b>                                                | <b>0.01</b> | <b>6.22E-07</b> |                                                |             |                 | 2.03                                                           | 0.23        | 2.41E-18        |
| <i>b</i> <sub>2</sub>                                                                             |                                                            |             |                 | <b>1.97</b>                                    | <b>0.22</b> | <b>3.41E-18</b> | 1.95                                                           | 0.23        | 2.54E-17        |
| <i>b</i> <sub>3</sub>                                                                             |                                                            |             |                 |                                                |             |                 | <b>0.63</b>                                                    | <b>0.21</b> | <b>3.24E-03</b> |
| $\lambda$                                                                                         |                                                            |             |                 | 5.45                                           | 1.42        | 1.34E-04        | 5.11                                                           | 1.33        | 1.20E-04        |
| $\gamma$                                                                                          |                                                            |             |                 |                                                |             |                 | 0.35                                                           | 1.05        | 0.740           |
| N observations                                                                                    | 67,805                                                     |             |                 | 1,647                                          |             |                 | 1,647                                                          |             |                 |
| N individuals                                                                                     | 8,588                                                      |             |                 | 1,647                                          |             |                 | 1,647                                                          |             |                 |
| Within-individual                                                                                 | 1.43                                                       |             |                 | NA                                             |             |                 | NA                                                             |             |                 |
| Variation Total Error Variance                                                                    | 1.61                                                       |             |                 | 4.54                                           |             |                 | 4.54                                                           |             |                 |
| <b>Panel B: Social Science Genetic Association Consortium Depressive Symptoms Polygenic Score</b> |                                                            |             |                 |                                                |             |                 |                                                                |             |                 |
| <i>a</i>                                                                                          | 0.26                                                       | 0.07        | 6.34E-05        | 1.01                                           | 0.77        | 1.91E-01        | 1.05                                                           | 0.77        | 0.170           |
| <u>Covariates</u>                                                                                 |                                                            |             |                 |                                                |             |                 |                                                                |             |                 |
| Male Sex                                                                                          | -0.36                                                      | 0.03        | 5.38E-38        | -0.14                                          | 0.12        | 2.71E-01        | -0.14                                                          | 0.12        | 0.254           |
| Birth Year                                                                                        | 0.02                                                       | 0.00        | 5.50E-27        | 0.04                                           | 0.01        | 1.87E-03        | 0.03                                                           | 0.01        | 0.003           |
| Age                                                                                               | 0.02                                                       | 0.00        | 1.27E-63        | 0.01                                           | 0.01        | 1.90E-01        | 0.01                                                           | 0.01        | 0.204           |
| <u>Effects</u>                                                                                    |                                                            |             |                 |                                                |             |                 |                                                                |             |                 |
| <i>b</i> <sub>1</sub>                                                                             | <b>0.13</b>                                                | <b>0.01</b> | <b>5.62E-22</b> |                                                |             |                 | -0.05                                                          | 0.09        | 0.595           |
| <i>b</i> <sub>2</sub>                                                                             |                                                            |             |                 | <b>1.97</b>                                    | <b>0.22</b> | <b>3.41E-18</b> | 1.99                                                           | 0.23        | 4.71E-18        |
| <i>b</i> <sub>3</sub>                                                                             |                                                            |             |                 |                                                |             |                 | <b>0.69</b>                                                    | <b>0.23</b> | <b>0.003</b>    |
| $\lambda$                                                                                         |                                                            |             |                 | 5.45                                           | 1.42        | 1.34E-04        | 5.23                                                           | 1.41        | 2.04E-04        |
| $\gamma$                                                                                          |                                                            |             |                 |                                                |             |                 | -0.18                                                          | 0.89        | 0.839           |
| N observations                                                                                    | 67,805                                                     |             |                 | 1,647                                          |             |                 | 1,647                                                          |             |                 |
| N individuals                                                                                     | 8,588                                                      |             |                 | 1,647                                          |             |                 | 1,647                                                          |             |                 |
| Within-individual                                                                                 | 1.42                                                       |             |                 | NA                                             |             |                 | NA                                                             |             |                 |
| Variation Total Error Variance                                                                    | 1.61                                                       |             |                 | 4.54                                           |             |                 | 4.54                                                           |             |                 |

\* Model 1 restricts the values of  $\beta_2$  and  $\beta_3$  to be zero, resulting in a standard linear model.

\*\*Model 2 restricts values of  $\beta_1, \beta_3$ , and Delta to zero in order to estimate the main effect of the death of a spouse without regard to genotype



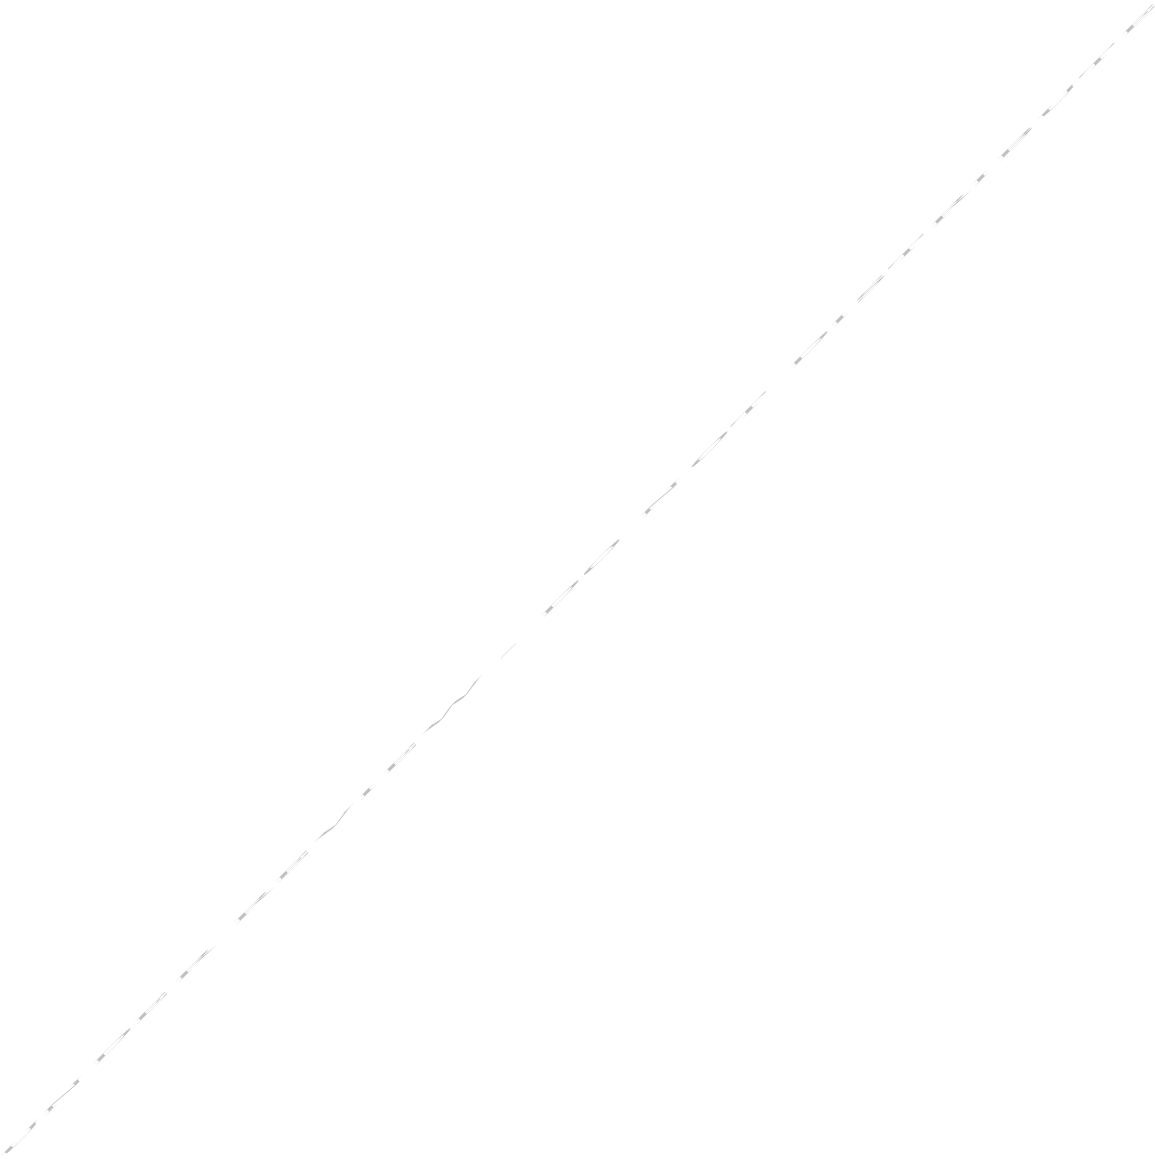

Supplement: appi.ajp.2017.16111209.ds001.pdf [file appi.ajp.2017.16111209.ds001.pdf]
